## Research Paper

# An association between water, sanitation, and hygiene (WASH) and prevalence of trachoma in Monze district of Southern Province, Zambia

Musonda Chikwanda, Nosiku Munyinda , Consity Mwale, Prince Mbanefo, Tikulirekuti Chileshe Banda and Patricia Mubita 

### ABSTRACT

This study aims to determine the association between water, sanitation, and hygiene, and the prevalence of trachoma in Monze district, Zambia. The overall prevalence of trachoma among residents of Monze district is 2.0% disaggregated as 3.4% for 1–9 age group and 1.1% for  $\geq 10$  age group. The findings reveal an association between trachoma eye infection and drinking water source from protected well/spring, and piped water. After adjusting for other variables, there was an association of drinking water from a protected well/spring (AOR 8.343, CI 1.126–61.803), piped water (AOR 4.127, CI 1.088–15.648), and piped water for washing (AOR 0.172, 95% CI 0.031–0.944.439). The presence of a hand wash facility was very low at 2.9% while hand washing agents were even lower at 0.41%. The study concludes that children are at a higher risk of trachoma prevalence. Other WASH aspects, such as adequacy of water, might be more important than the presence of potable water. The prevalence of trachoma in Monze is WASH focused.

**Key words** | trachoma, water and sanitation

### HIGHLIGHTS

- The research showed a significant need for attention 1–9 age group. Children are at a higher risk of trachoma prevalence.
- The research reveals that having water from a protected water source if the water source is not easily accessible makes trachoma prevention difficult.
- The findings serve as a foundation for the Monze Municipal Council and the community to advocate for more resources allocation to access to quality water.

### INTRODUCTION

According to Feasey *et al.* (2010), trachoma is a neglected tropical disease. It is the leading cause of blindness

worldwide and remains a major public health problem in 42 countries and responsible for the blindness or visual impairment of about 1.9 million people. It causes about 1.4% of all blindness worldwide, with the global focus in sub-Saharan Africa, particularly its poorest and most isolated rural communities (Agarwal *et al.* 2016). In 2013,

This is an Open Access article distributed under the terms of the Creative Commons Attribution Licence (CC BY 4.0), which permits copying, adaptation and redistribution, provided the original work is properly cited (<http://creativecommons.org/licenses/by/4.0/>).

doi: 10.2166/washdev.2021.255

**Musonda Chikwanda** (corresponding author)  
University of Zambia Ridgeway Campus, University  
of Zambia School of Public Health,  
Department of Environmental Health,  
Lusaka, Zambia  
E-mail: [musondachikwanda1@gmail.com](mailto:musondachikwanda1@gmail.com)

**Nosiku Munyinda**   
**Patricia Mubita**   
School of Public Health,  
Department of Environmental Health,  
University of Zambia Ridgeway Campus,  
Lusaka, Zambia

**Consity Mwale**  
Ministry of Health,  
Lusaka District Medical Office,  
Lusaka, Zambia

**Prince Mbanefo**  
American University,  
School of Public Affairs,  
Department of Law and Economics,  
Washington DC, USA

**Tikulirekuti Chileshe Banda**  
Center for Infectious Diseases Zambia,  
Lusaka, Zambia

it was estimated that the African continent was host to 4 million cases of trichiasis (47% of all cases globally), with 33 of 56 African countries thought to be endemic (Smith *et al.* 2013). In Zambia, blindness approximately affects 1% of the population with about 105,000 people affected by the disease (Ministry of Health 2013). Trachoma is the most common infectious cause of blindness which is caused by ocular serovars of *Chlamydia trachomatis*. Repeated infection by *C. trachomatis* can cause follicular conjunctivitis that results in chronic inflammation, peripheral corneal vascularization, or pannus formation (Communicable Diseases Network Australia 2014). Repeated episodes of reinfection within the family cause chronic follicular or intense conjunctival inflammation, also known as active trachoma, which leads to tarsal conjunctival scarring (Burton & Solomon 2004). Scarring may ultimately lead to trachomatous trichiasis and irreversible visual impairment or blindness. Miller *et al.* (2004) reported that trachoma is spread by direct contact with eye, nose, and throat secretions from affected individuals. It can also be spread by contact with fomites such as handkerchiefs, towels, or washcloths contaminated with these secretions. Eye-seeking flies such as *Musca sorbents* can carry *C. trachomatis*, but there is no animal or insect reservoir.

Many factors contribute to trachoma infection. These include poor personal hygiene, lack of access to clean water and availability, and type of sanitary facility. To better understand the high trachoma prevalence, the 2018 Ministry of Health, Zambia conducted a Tropical Data Trachoma health survey in 47 districts (MoH 2013). Based on the high prevalence (52.3%) revealed from an earlier survey conducted from 2007 to 2012, data in Monze district were extracted to determine the association of water sanitation and hygiene with the prevalence of trachoma. The study aims to determine the association between water, sanitation, and hygiene, and the prevalence of trachoma in Monze.

## METHODS

This study uses secondary data from the Ministry of Health Tropical Trachoma Data Survey. The study used cluster sampling methods. The sampling was done by the Ministry

of Health for a baseline survey conducted in 2018. The World Health Organization (WHO) recommendations for the planned sample size for each evaluation unit (EU) were followed (Mwale *et al.* 2018), to estimate the trachomatous inflammation follicular (TF) prevalence of 4%, a 95% confidence interval, and set an absolute precision of 2%. The study took into account variation of the sample and size of clusters and used a design effect of 2.63 and inflated the results by 20% to take care of non-responders. With the aid of OpenEpi, a sample size of 593 households and 2,710 individuals was calculated. Taking into account a non-response rate of 20%, the sample size was adjusted to 741 for households and 3,388 for individuals.

Data were extracted using a data extraction tool and analyzed using Stata version 14. The full and cleaned dataset responses consisted of 736 households and 3,148 individuals. Independent variables extracted included age, sex, source of washing water, source of drinking water, type of sanitary facility, type of latrine, and availability of wash facility) and matched with the dependent variable (prevalence of trachoma).

## STATISTICAL ANALYSIS

Data were analyzed using Stata 14. Descriptive results were presented as percentages and means (with 95% confidence intervals). Univariate analysis of independent variables was used to describe the variables (age, sex, households, type of sanitary facility, and water source). Cross-tabulations were done to see if there was any association between the dependent variable trachoma and dependent variables (age, sex, type sanitary, source of drinking water, etc.). Later, multivariate logistic regression was done to check for confounding variables. Any variable with a *p*-value of >0.100 in the simple regression was not included in the logistic regression model.

All variables with a *p*-value of less than >0.05 in the multivariate logistic regression model were significant. The backward logistic regression method was used. The method was used to remove variables one at a time beginning with the largest *p*-value and continuing until all remaining effects were significant at a specified level.

## RESULTS

Table 1 shows that most of the respondents who are heads of households were  $\geq 50$  years old (29.6%). The youngest age of heads of households ( $\leq 21$  years) was 3%. Furthermore, more males are heads of households as compared to females. For the household size, the study revealed that houses that had 1–5 individuals was 512 (69.6%), with the lowest being 11–20 individuals in six households covering 0.8%.

For the type of sanitary facility, the most used sanitary facility by households is pit latrines, which account for 431 (58.6%) and the least used is a pour water to flush toilet (29, 39%). The rest of the participants used the bush

**Table 1** | Characteristics of households in Monze district

| Variable                 | Number (n) | Percentage (%) |
|--------------------------|------------|----------------|
| Age of household heads   |            |                |
| <21                      | 22         | 3.0            |
| 21–30                    | 188        | 25.5           |
| 31–40                    | 175        | 23.8           |
| 41–50                    | 133        | 18.1           |
| >50                      | 218        | 29.6           |
| Sex of household heads   |            |                |
| Male                     | 405        | 55.0           |
| Female                   | 331        | 45.0           |
| Household size           |            |                |
| 1–5                      | 512        | 69.6           |
| 6–10                     | 218        | 29.6           |
| 11–20                    | 6          | 0.8            |
| Type of toilet           |            |                |
| Flush/Pour flush         | 29         | 3.9            |
| Pit latrine              | 431        | 58.6           |
| No facilities or bush    | 276        | 37.5           |
| Use and mode of toilet   |            |                |
| Shared or public latrine | 152        | 20.6           |
| Private latrine          | 300        | 40.8           |
| No structure (other)     | 284        | 38.6           |
| Availability of water    |            |                |
| Present                  | 21         | 2.9            |
| Absent                   | 715        | 97.2           |
| Washing agent            |            |                |
| Present                  | 3          | 0.4            |
| Absent                   | 733        | 99.6           |

to answer the call of nature. Households in Monze use private latrines as compared to shared or communal latrines.

Table 1 shows that more families do not have any form of washing agent after using the toilet. The study revealed that only 21 (2.9%) houses had water for washing and 715 (97.2%) had no water. For those who had a washing agent to wash their hands, it was discovered that only three (0.4%) houses either had soap, ash, or any other wash agent to clean their hands after defecating. 733 (99.6%) had nothing.

Table 2 shows that out of 3,148 tested, 1,254 (37.0%) were 1–9 years old 37.0%, while 2,134 (63.3%) were in the age group of 9 years and older). The results also show more women as compared to males were tested; males 1,600 (47.2%) and females 1,788 (52.8%), respectively.

Table 3 shows that participants aged between 1 and 9 years had a higher prevalence for the presence of trachoma (42, 65.6%) and it was lower for the  $\geq 9$  age group (22, 34.4%). The research also revealed that females had a higher prevalence (38, 59.4%) as compared to males (26, 40.6%). Children from 1 to 9 years are at a higher risk of contracting trachoma, which simply means there was a significant difference between age and trachoma ( $p = 0.001$ ). However, there was no significant difference between sex and trachoma ( $p = 0.444$ ). There was a significant difference in water for washing in the dry season and the presence of trachoma ( $p = 0.019$ ). There was also a significant difference between drinking water source and trachoma ( $p = 0.022$ ).

Table 4 shows that there was significant association between modes of toilet use and trachoma ( $p = 0.043$ ). It also shows there was a significant difference for the type of toilet used with trachoma ( $p = 0.037$ ).

Table 5 shows the odds of having active trachoma among households who had a water source from a protected

**Table 2** | Individual demographics and trachoma eye tests ( $N = 3,388$ )

| Variable  | Number | Percentage |
|-----------|--------|------------|
| Age       |        |            |
| 1–9       | 1,254  | 37.0       |
| $\geq 10$ | 2,134  | 63.0       |
| Sex       |        |            |
| Female    | 1,788  | 52.8       |
| Male      | 1,600  | 47.2       |

Note: 3,148 only were tested.

**Table 3** | Bivariate analysis

| Variable                                     | Had trachoma |            |        |            | <i>p</i> |
|----------------------------------------------|--------------|------------|--------|------------|----------|
|                                              | Yes          |            | No     |            |          |
|                                              | Number       | Percentage | Number | Percentage |          |
| Age                                          |              |            |        |            | <0.001   |
| 1–9                                          | 42           | 65.6%      | 1,186  | 38.5%      |          |
| ≥9                                           | 22           | 34.4%      | 1,898  | 61.5%      |          |
| Sex                                          |              |            |        |            | 0.444    |
| Male                                         | 26           | 40.6%      | 1,426  | 46.2%      |          |
| Female                                       | 38           | 59.4%      | 1,658  | 53.8%      |          |
| Drinking water source in the dry season      |              |            |        |            | 0.019    |
| Borehole                                     | 32           | 50.0%      | 1,717  | 55.7%      |          |
| Protected well/spring                        | 17           | 26.6%      | 417    | 13.5%      |          |
| Unprotected well/spring                      | 9            | 14.1%      | 431    | 14.0%      |          |
| Surface (rivers)                             | 0            | 0.0%       | 176    | 5.7%       |          |
| Piped                                        | 6            | 9.4%       | 343    | 11.1%      |          |
| Time it took to get water for drinking       |              |            |        |            | 0.293    |
| Water source in yard                         | 2            | 3.1%       | 276    | 8.9%       |          |
| Less than 30 minutes                         | 44           | 68.8%      | 1,926  | 62.5%      |          |
| Between 30 minutes and 1 hour                | 15           | 23.4%      | 793    | 25.7%      |          |
| More than one hour                           | 3            | 4.7%       | 89     | 2.9%       |          |
| Water for washing in dry season source       |              |            |        |            | 0.022    |
| Borehole                                     | 32           | 50.0%      | 1,684  | 54.6%      |          |
| Protected well/spring                        | 15           | 23.4%      | 429    | 13.9%      |          |
| Unprotected well/spring                      | 14           | 21.9%      | 478    | 15.5%      |          |
| Surface (rivers)                             | 0            | 0.0%       | 176    | 5.7%       |          |
| Piped                                        | 3            | 4.7%       | 317    | 10.3%      |          |
| The time it took to get water for washing    |              |            |        |            | 0.072    |
| All face washing is done at the water source | 3            | 4.7%       | 66     | 2.1%       |          |
| Water source in yard                         | 0            | 0.0%       | 260    | 8.4%       |          |
| Less than 30 minutes                         | 43           | 67.2%      | 1,893  | 61.4%      |          |
| Between 30 minutes and 1 hour                | 15           | 23.4%      | 781    | 25.3%      |          |
| More than 1 hour                             | 3            | 4.7%       | 84     | 2.7%       |          |

well was eight times higher than households who had piped water, who are four times more likely to have active trachoma (AOR = 8.3; 95% CI 1.1–16.8). The analysis revealed that households whose source of drinking water was a protected well had an association with having trachoma of  $p = 0.038$  and for piped water the association with having trachoma was  $p = 0.037$ . For washing water source, piped water had an association of  $p = 0.043$ . Also, time to fetch water and

where people defecated were independently associated with the presence of trachoma ( $p = 0.044$ ).

## DISCUSSION

The study made an association of water, sanitation, and hygiene with the prevalence of trachoma in Monze district.

**Table 4** | Bivariate analysis of sanitary facility by trachoma

|                                      | Had trachoma |        |       |       | p     |
|--------------------------------------|--------------|--------|-------|-------|-------|
|                                      | Yes          |        | No    |       |       |
|                                      | N            | %      | N     | %     |       |
| Mode of toilet use                   |              |        |       |       | 0.043 |
| Shared or public latrine             | 19           | 29.7%  | 644   | 20.9% |       |
| Private latrine                      | 31           | 48.4%  | 1,228 | 39.8% |       |
| No structure, outside somewhere      | 14           | 21.9%  | 1,183 | 38.4% |       |
| Other                                | 0            | 0.0%   | 29    | 0.9%  |       |
| Type of toilet                       |              |        |       |       | 0.037 |
| Flush/Pour flush                     | 2            | 3.1%   | 137   | 4.4%  |       |
| Latrine                              | 49           | 76.6%  | 1,756 | 55.8% |       |
| Bush                                 | 13           | 20.3%  | 1,191 | 38.6% |       |
| Had water for handwashing            |              |        |       |       | 0.403 |
| Absent                               | 64           | 100.0% | 3,012 | 97.7% |       |
| Present                              | 0            | 0.0%   | 72    | 2.3%  |       |
| Had hand wash chemical in the toilet |              |        |       |       | 1.000 |
| Absent                               | 64           | 100.0% | 3,072 | 99.6% |       |
| Present – ash, mud, or sand          | 0            | 0.0%   | 12    | 0.4%  |       |

It determined the proportion of households using improved sanitation facilities in Monze district in 2018. It also assessed the prevalence of trachoma among residents of Monze district. Lastly, it determined the relationship between water access and trachoma and the relationship between sanitary facilities and trachoma among residents of Monze district. The overall prevalence of trachoma among residents of Monze is higher in the age group of 19 years as compared to that of  $\geq 10$  years.

Similarly, [Mariotti \*et al.\* \(2009\)](#) found that the main age group affected by trachoma includes children aged 1–5 years. Even though this study has a higher age group category of 1–9 years, it can be concluded that children are at a higher risk of getting trachoma. A survey done in 2013 showed that the prevalence of trachoma in Monze district was 52.3% ([MoH 2013](#)). The drastic decrease in the prevalence of trachoma in selected districts in Zambia can be attributed to disease control and prevention measures taken by the government and SAFE strategy supporting partners. According to [Muma \(2018\)](#) ‘Zambia has embarked on programs to eliminate trachoma by the year 2025. The

government and the cooperating partners are strongly focused on implementing the SAFE strategy through a comprehensive and multi-sectoral strategy’. [Markle \*et al.\* \(2017\)](#) further explained how close community intervention programs such as Community Led Total Sanitation (CLTS) in the Southern Province of Zambia have allowed district health officials, teachers, traditional leaders, community leaders, parents, and children to receive educational talks with the distribution of folders and banners regarding the disease and ways to prevent it, including the maintenance of clean faces to avoid bacterial transmission.

The significant drop of Trachoma prevalence in the Southern province of Zambia, particularly Monze, can be attributed to the extensive trachoma program. In a study done by [Astle \*et al.\* \(2006\)](#), in the Southern Province of Zambia, it explains that trachoma programs, attempts to alter hygiene practices, including latrines, face washing, dish racks, rubbish pits, and hand wash stations, are both environmental and health education activities. These activities play a significant role in the prevention of trachoma and are attributed to the decrease.

The frequency of trachoma was high in females as compared to males but not statistically significant. Comparing similar findings from Brazil, [Gambhir \*et al.\* \(2007\)](#) elaborate that it is possible that the greater frequency of trachoma cases among females could be related to the more effective behavior among them, as direct person–person contact is an important form of infection transmission. It is evident that in developing countries women take the role of the first point of contact with the children from the time they are born. This makes them more susceptible to the disease as compared to men.

Furthermore, the factors that were associated with trachoma eye infection were drinking water sources, such as well water or spring water. This simply means that a household with a drinking water source from well or spring water is more likely to be infected by trachoma. Interestingly, households that had piped water were four times more likely to get trachoma. This contrasts with findings of most related studies which show that piped water supply reduces trachoma prevalence ([Golovaty \*et al.\* 2009](#)). According to [Baggaley \*et al.\* \(2006\)](#), trachoma prevalence and piped water is linked with the distance to water sources. This could be due to inadequate access to the water supply.

**Table 5** | Logistic regression of source of drinking water, the time it took to fetch drinking water and type of toilet by trachoma

|                                            | OR    | 95% CI       | p     | AOR   | 95% CI       | p     |
|--------------------------------------------|-------|--------------|-------|-------|--------------|-------|
| Drinking water source in the dry season    |       |              |       |       |              |       |
| Borehole (ref)                             |       |              |       |       |              |       |
| Protected well/spring                      | 2.187 | 1.203–3.977  | 0.010 | 8.343 | 1.126–61.803 | 0.038 |
| Unprotected well/spring                    | 1.120 | 0.531–2.375  | 0.765 | 0.556 | 0.137–2.250  | 0.411 |
| Surface (rivers)                           | 1.000 |              |       | 1.000 |              |       |
| Piped                                      | 0.939 | 0.389–2.262  | 0.888 | 4.127 | 1.088–15.648 | 0.037 |
| The time it took to get water for drinking |       |              |       |       |              |       |
| Water source in the yard (ref)             |       |              |       |       |              |       |
| Less than 30 minutes                       | 3.153 | 0.760–13.078 | 0.114 | 2.992 | 0.677–13.230 | 0.148 |
| Between 30 minutes and 1 hour              | 2.610 | 0.593–11.487 | 0.204 | 3.171 | 0.686–14.651 | 0.139 |
| More than 1 hour                           | 4.652 | 0.765–28.284 | 0.095 | 5.331 | 0.796–35.692 | 0.085 |
| Washing water source in the dry season     |       |              |       |       |              |       |
| Borehole (ref)                             |       |              |       |       |              |       |
| Protected well/spring                      | 1.840 | 0.987–3.489  | 0.055 | 0.229 | 0.028–1.862  | 0.168 |
| Unprotected well/spring                    | 1.541 | 0.816–2.912  | 0.183 | 2.990 | 0.819–10.249 | 0.099 |
| Surface (rivers)                           | 1.000 |              |       | 1.000 |              |       |
| Piped                                      | 0.498 | 0.152–1.636  | 0.251 | 0.172 | 0.031–0.944  | 0.043 |
| Where people defecated                     |       |              |       |       |              |       |
| Shared or public latrine (ref)             |       |              |       |       |              |       |
| Private latrine                            | 0.856 | 0.480–1.567  | 0.598 | 0.825 | 0.450–1.510  | 0.532 |
| Bush                                       | 0.401 | 0.100–0.805  | 0.010 | 0.465 | 0.221–0.981  | 0.044 |
| Other                                      | 1.000 |              |       | 1.000 |              |       |

There was no association recorded for the time it took to get water for drinking. According to Cairncross (1999), the relationship between water supplies and trachoma is sometimes more complex than it might seem, and the proof that water supply improvement can help to reduce trachoma can sometimes be difficult. Zerihun (1997) further elaborates, in a study done in Ethiopia, that found that people living further than 15 minutes' walk from a water source had less active trachoma than those with a source of water closer.

For washing water sources in the dry season (piped) the study revealed that participants were less likely to have trachoma. Participants that defecated in the bush were less likely to have trachoma. According to the WHO/UNICEF (2013), transmission of trachoma in a population that practices open defecation is explained using indirect factors; these include how dense the population is. Depending on how dense the population is these 'fecal fields' potentially

put the village and, consequently, water sources at risk and attract flies, a major vector in the transmission of trachoma (Howard *et al.* 2013). Furthermore, there was no association for participants that used private latrine. Monze is a densely populated area and even if people defecate in open fields there is a likelihood of having more flies working as a vector to transmit the disease.

Hand washing after the use of sanitary facilities is an important act in reducing infection with trachoma (Zimba *et al.* 2016). It is clear from the findings that there was no availability of hand washing agents in the majority of the households, only households that had ash, mud, or sand. According to a study by Fewtrell *et al.* (2005), handwashing with soap is an effective practice for reducing trachoma. It is therefore necessary to highlight the importance of face washing. Special focus should be on hygiene education for children as they are not usually taught the importance of keeping their faces clean.



Tadesse *et al.* (2017) shows a remarkable improvement in the status of trachoma prevalence because of adequate water supply, sanitation, and hygiene situation after the intervention period. To explain the magnitude and influence of trachoma prevalence on the type of sanitary facility, the research conducted a meaningful comparison of effect modification for the different age groups by comparing by type of sanitary facility and water source after adjusting for age and the presence of trachoma. Households without a sanitary facility showed no association with the significance of active trachoma compared with households that had piped water and a private sanitary facility that were eight times more likely to have trachoma.

## CONCLUSIONS

The study determined the association of water, sanitation, and hygiene with the prevalence of trachoma in Monze district. Trachoma is a public health problem among children under nine years of age in Monze district. Children are at a higher risk of trachoma prevalence. Having water from a protected water source if the water source is not easily accessible makes trachoma prevention difficult. The use of the bush for defecation may not necessarily cause trachoma if the population is not dense. The major factors associated with the prevalence of trachoma in Monze are WASH focused.

## DATA AVAILABILITY STATEMENT

All relevant data are included in the paper or its Supplementary Information.

## REFERENCES

- Agarwal, A. K., Rakesh, M., Nandeswar, S. & Prasad, P. 2016 A clinico-epidemiological study of trachoma in urban and rural population of Sagar District Madhya Pradesh, India. *Comm. Acquire. Infect.* **3**, 10–15.
- Astle, W., Wiafe, B., Ingram, A., Mwanga, M. & Glassco, C. 2006 Trachoma control in Southern Zambia – an international team project employing the SAFE strategy. *Ophthalm. Epidemiol.* **13**, 227–236. doi: 10.1080/09286580600718974.
- Baggaley, R. F., Solomon, A. W., Kuper, H., Polack, S., Massae, P. A., Kelly, J., Safari, S., Alexander, N. D. E., Courtright, P., Foster, A. & Mabey, D. C. 2006 Distance to water source and altitude concerning active trachoma in Rombo District, Tanzania. *Trop. Med. Int. Health* **11**, 220–227.
- Burton, M. & Solomon, A. 2004 What's new in trichiasis surgery? *Commun. Eye Health J.* **17** (52), 52–53.
- Cairncross, S. 1999 Trachoma and water. *Commun. Eye Health J.* **12** (32), 58–59.
- Communicable Diseases Network Australia (CDNA) 2014 *National Guidelines for the Public Health Management of Trachoma*. Department of Health, Australia.
- Feasey, N., Wansbrough-Jones, M., Mabey, D. C. & Solomon, A. W. 2010 Neglected tropical diseases. *Br. Med. Bull.* **93**, 179–200. doi:10.1093/bmb/ldp046.
- Fewtrell, L., Kaufmann, R. B., Kay, D., Enanoria, W., Haller, L. & Colford, J. M. 2005 Water, sanitation, and hygiene interventions to reduce diarrhoea in less developed countries: a systematic review and meta-analysis. *Lancet Infect Dis.* **5**, 42–52.
- Gambhir, M., Basáñez, M. G., Turner, F., Kumaresan, J. & Grassly, N. C. 2007 Trachoma: transmission, infection, and control. *Lancet Infect. Dis.* **7**, 420–427. pmid:17521595.
- Golovaty, I., Jones, L., Gelaye, B., Tilahun, M., Belete, H., Kumie, A., Berhane, Y. & Williams, M. A. 2009 Access to water source, latrine facilities and other risk factors of active trachoma in Ankober, Ethiopia. *PLoS One* **4** (8), e6702.
- Howard, G., Pedley, S., Barrett, M., Nalubega, M. & Johal, K. 2013 Risk factors contributing to microbiological contamination of shallow groundwater in Kampala, Uganda. *Water Res.* **37**, 3421–3429.
- Mariotti, S. P., Pascolini, D. & Rose-Nussbaumer, J. 2009 Trachoma: global magnitude of a preventable cause of blindness. *Br. J. Ophthalmol.* **93**, 563–568. pmid:19098034.
- Markle, L., Maganani, A., Katooka, O., Tiwari, A., Osbert, N., Larsen, D. A. & Winters, B. 2017 A mobile platform enables unprecedented sanitation uptake in Zambia. *PLoS Negl. Trop. Dis.* **11** (1), e0005131. https://doi.org/10.1371/journal.pntd.0005131.
- Miller, K., Pakpour, N. & Yi, E. 2004 Pesky trachoma suspect finally caught. *Br. J. Ophthalmol.* **88**, 750.
- Ministry of Health 2013 *Eliminating Trachoma in Zambia, Zambia 'SAFE' Strategy Implementation Framework 2013–2018*. Directorate of Clinical Care and Diagnostic Services National Eye Health Coordination, Lusaka, Zambia.
- Muma, M. K. I. 2018 Trachoma in Zambia. *Health Press Zambia Bull.* **2** (10&11), 17.
- Mwale, C., Mumbi, W., Funjika, M., Sokesi, T., Silumesii, A., Mulenga, M., Mutati, G., Kwendakwema, D., Chelu, C., Adamu, Y., Alemayehu, W., Al-Khatib, T., Bakhtiari, A., Dejene, M., Massae, P. A., Mpyet, C., Nwosu, C., Willis, R., Courtright, P. & Solomon, A. W. 2018 Prevalence of trachoma in 47

- administrative districts of Zambia: results of 32 population-based prevalence surveys. *Ophthalm. Epidemiol.* **25** (Suppl.1), 171–180. <https://doi.org/10.1080/09286586.2018.1546880>.
- Smith, J. L., Flueckiger, R. M., Hooper, P. J., Polack, S., Cromwell, E. A., Palmer, S. L. & Brooker, S. J. 2013 The geographical distribution and burden of trachoma in Africa. *PLoS Neglect. Trop. Dis.* **7** (8), e2359. <http://doi.org/10.1371/journal.pntd.0002359>.
- Tadesse, B., Worku, A., Kumie, A. & Yimer, S. A. 2017 Effect of water, sanitation, and hygiene interventions on active trachoma in North and South Wollo zones of Amhara Region, Ethiopia: a quasi-experimental study. *PLoS Neglect. Trop. Dis.* **11** (11), e0006080. <https://doi.org/10.1371/journal.pntd.0006080>.
- WHO/UNICEF 2013 Progress on sanitation and drinking water: 2013 update. Joint Monitoring Program. [www.who.int/water\\_sanitation\\_health/publications/2012/globalcosts.pdf](http://www.who.int/water_sanitation_health/publications/2012/globalcosts.pdf)
- Zerihun, N. 1997 Trachoma in Jimma zone, Southwestern Ethiopia. *Trop. Med. Int. Health* **2**, 1115–1121.
- Zimba, R., Ngulube, V., Lukama, C., Manangi, A., Tiwari, A., Osbert, N., Hoehne, A., Muleya, S., Mukosha, L., Crooks, P., Chikobo, C., Winters, B. & Larsen, D. A. 2016 Chiengi District, Zambia open defecation free after 1 year of community-led total sanitation. *Am. J. Trop. Med. Hyg.* **95**, 925–927.

First received 13 November 2020; accepted in revised form 1 February 2021. Available online 31 March 2021
